# Supplementary material
Source: PubMed Central journal article supplement (PMC9004324)
Supplement: NIHMS763677-supplement-Supplementary_Material.pdf [file NIHMS763677-supplement-Supplementary_Material.pdf]

## Supplementary Online Content

Yang Q, Cogswell ME, Flanders WD, et al. Trends in cardiovascular health metrics and associations with all-cause and CVD mortality among US adults. *JAMA*. doi: 10.1001/JAMA.2012.339.

**eTable 1.** Definitions of Ideal, Intermediate, and Poor Cardiovascular Health Metrics for Adults

**eTable 2.** Adjusted Hazard Ratios (HRs) of All-Cause and CVD Mortality by Cardiovascular Health Metrics and Age Group, NHANES III (1988-1994) Linked Mortality File (Through 2006)

**eTable 3.** Adjusted Hazard Ratios (HRs) of All-Cause and CVD Mortality by Cardiovascular Health Metrics and Sex, NHANES III (1988-1994) Linked Mortality File (Through 2006)

**eTable 4.** Adjusted Hazard Ratios (HRs) of All-Cause and CVD Mortality by Number of Cardiovascular Health Metrics Met and Race/Ethnicity, NHANES III (1988-1994) Linked Mortality File (Through 2006)

**eTable 5.** Adjusted Hazard Ratios (HRs) of All-Cause and CVD Mortality by Cardiovascular Health Metrics and Educational Attainment, NHANES III (1988-1994) Linked Mortality File (Through 2006)

**eTable 6.** Adjusted Hazard Ratios (HRs) of All-Cancer Mortality by Cardiovascular Health Metrics, NHANES III (1988-1994) Linked Mortality File (Through 2006)

**eTable 7.** Weighted Prevalence, Adjusted Hazard Ratios (HRs) and Population-Attributable Fractions (PAFs) (95% Confidence Intervals) for Cardiovascular Health Metrics and Risk of All-Cause and CVD Mortality With BMI Classified as  $<30$  vs  $\geq 30$  and Total Cholesterol as  $<240$  vs.  $\geq 240$  mg/dL, NHANES III (1988-1994) Linked Mortality File (Through 2006)

**eTable 8.** Adjusted Hazard Ratios (HRs) of All-Cause, CVD, and IHD Mortality by Cardiovascular Health Metrics With BMI Classified as  $<30$  vs  $\geq 30$  and Total Cholesterol as  $<240$  vs  $\geq 240$  mg/dL, NHANES III (1988-1994) Linked Mortality File (Through 2006)

**eTable 9.** Baseline Characteristics by Number of Cardiovascular Health Metrics, NHANES III (1988-1994) Linked Mortality File (Through 2006)

This supplementary material has been provided by the authors to give readers additional information about their work.

**eTable 1.** Definitions of Ideal, Intermediate, and Poor Cardiovascular Health Metrics for Adults

| Goal/Metrics                 | AHA definitions of Cardiovascular health metrics *         | Definitions for prevalence and trends analyses or nearest match in NHANES 1988-1994, 1999-2004, and 2005-2010                                                                                               |                                                                                                                                                                                                           |                                                                                                                                                                                                           | NHANES III Linked Mortality File (through 2006) analyses                                                                                                                                        |
|------------------------------|------------------------------------------------------------|-------------------------------------------------------------------------------------------------------------------------------------------------------------------------------------------------------------|-----------------------------------------------------------------------------------------------------------------------------------------------------------------------------------------------------------|-----------------------------------------------------------------------------------------------------------------------------------------------------------------------------------------------------------|-------------------------------------------------------------------------------------------------------------------------------------------------------------------------------------------------|
|                              |                                                            | NHANES III (1988-1994)                                                                                                                                                                                      | NHANES 1999-2004                                                                                                                                                                                          | NHANES 2005-2010                                                                                                                                                                                          |                                                                                                                                                                                                 |
| <b>Smoking status</b>        |                                                            |                                                                                                                                                                                                             |                                                                                                                                                                                                           |                                                                                                                                                                                                           |                                                                                                                                                                                                 |
| <b>Ideal</b>                 | Never or quit >12 months ago                               | NHANES III did not ask the time since quitting smoking. For the ideal category of smoking status, we included the participants who self-reported never smoking for consistent estimates across the surveys. | NHANES 1999-2004 asked the time since quitting smoking. To be consistent with NHANES III estimate, we included the participants who self-reported never smoking for the ideal category of smoking status. | NHANES 2005-2010 asked the time since quitting smoking. To be consistent with NHANES III estimate, we included the participants who self-reported never smoking for the ideal category of smoking status. | NHANES 1999-2004 and 2005-2010 estimates indicated that only about 3% former smokers had quit <12 months ago, so we used the definition of current smoking vs. others in the association study. |
| <b>Intermediate</b>          | Former or quit ≤ 12 months                                 | For intermediate category of smoking status, we included all former smokers.                                                                                                                                | We included all former smokers for the intermediate category of smoking status. However, among former smokers, only 2.9% (95% CI 2.4-3.5) had quit smoking <12 months.                                    | We included all former smokers for the intermediate category of smoking status. However, among former smokers, only 3.0% (95% CI 2.7-3.5) had quit smoking <12 months.                                    | -                                                                                                                                                                                               |
| <b>Poor</b>                  | Current smoking                                            | Current smoking                                                                                                                                                                                             | Current smoking                                                                                                                                                                                           | Current smoking                                                                                                                                                                                           | -                                                                                                                                                                                               |
| <b>Body mass index (BMI)</b> |                                                            |                                                                                                                                                                                                             |                                                                                                                                                                                                           |                                                                                                                                                                                                           |                                                                                                                                                                                                 |
| <b>Ideal</b>                 | <25 kg/m <sup>2</sup>                                      | <25 kg/m <sup>2</sup> (BMI is calculated as weight in kilograms divided by height in meters squared)                                                                                                        | <25 kg/m <sup>2</sup> (BMI is calculated as weight in kilograms divided by height in meters squared)                                                                                                      | <25 kg/m <sup>2</sup> (BMI is calculated as weight in kilograms divided by height in meters squared)                                                                                                      | BMI <25 vs. ≥25                                                                                                                                                                                 |
| <b>Intermediate</b>          | 25–29.9 kg/m <sup>2</sup>                                  | 25–29.9 kg/m <sup>2</sup>                                                                                                                                                                                   | 25–29.9 kg/m <sup>2</sup>                                                                                                                                                                                 | 25–29.9 kg/m <sup>2</sup>                                                                                                                                                                                 | -                                                                                                                                                                                               |
| <b>Poor</b>                  | ≥30.0 kg/m <sup>2</sup>                                    | ≥30.0 kg/m <sup>2</sup>                                                                                                                                                                                     | ≥30.0 kg/m <sup>2</sup>                                                                                                                                                                                   | ≥30.0 kg/m <sup>2</sup>                                                                                                                                                                                   | -                                                                                                                                                                                               |
| <b>Physical activity</b>     |                                                            |                                                                                                                                                                                                             |                                                                                                                                                                                                           |                                                                                                                                                                                                           |                                                                                                                                                                                                 |
| <b>Ideal</b>                 | 150+ min/wk moderate or 75+ min/wk vigorous or 150+ min/wk | NHANES III did not ask the duration of physical activities. We used the following definition to                                                                                                             | 150+ min/wk moderate or 75+ min/wk vigorous or 150+ min/wk moderate + vigorous. Physical                                                                                                                  | 150+ min/wk moderate or 75+ min/wk vigorous or 150+ min/wk moderate + vigorous for NHANES                                                                                                                 | Physical activities with 3<METS <6 and engaged in ≥5 times/wk or physical                                                                                                                       |

|                           |                                                                                   |                                                                                                                                                                                                                                                                                                                                                                                                                 |                                                                                                                                                                                                                                                                                                                                                                          |                                                                                                                                                                                                                                                                                                                                                                                               |                                                            |
|---------------------------|-----------------------------------------------------------------------------------|-----------------------------------------------------------------------------------------------------------------------------------------------------------------------------------------------------------------------------------------------------------------------------------------------------------------------------------------------------------------------------------------------------------------|--------------------------------------------------------------------------------------------------------------------------------------------------------------------------------------------------------------------------------------------------------------------------------------------------------------------------------------------------------------------------|-----------------------------------------------------------------------------------------------------------------------------------------------------------------------------------------------------------------------------------------------------------------------------------------------------------------------------------------------------------------------------------------------|------------------------------------------------------------|
|                           | moderate + vigorous                                                               | classify participants as physically active: physical activities with $3 \leq \text{METS} < 6$ and engaged in $\geq 5$ times/wk or physical activities with $\text{METS} \geq 6$ and 3.0 times/wk. <sup>15</sup> Physical activities included walking, jogging or running, bicycling, swimming, aerobics or aerobic dancing, other dancing, calisthenics, gardening or yard work, and other sports.              | activities included walking, jogging or running, bicycling, swimming, aerobics or aerobic dancing, other dancing, calisthenics, gardening or yard work, and other sports.                                                                                                                                                                                                | 2005-2006. The physical activity questionnaires changed substantially after NHANES 2007-2008; thus, we restricted our Trend analyses to data from NHANES 1999-2004 and 2005-2006 for consistency. Physical activities included walking, jogging or running, bicycling, swimming, aerobics or aerobic dancing, other dancing, calisthenics, gardening or yard work, and other sports.          | activities with METS $\geq 6$ and 3.0 times/wk. vs. others |
| <b>Intermediate</b>       | 1–149 min/wk moderate or 1–74 min/wk vigorous or 1–149 min/wk moderate + vigorous | The difference between physically active and none physical activity was taken as intermediate.                                                                                                                                                                                                                                                                                                                  | 1–149 min/wk moderate or 1–74 min/wk vigorous or 1–149 min/wk moderate + vigorous.                                                                                                                                                                                                                                                                                       | 1–149 min/wk moderate or 1–74 min/wk vigorous or 1–149 min/wk moderate + vigorous for NHANES 2005-2006.                                                                                                                                                                                                                                                                                       | -                                                          |
| <b>Poor</b>               | None                                                                              | None                                                                                                                                                                                                                                                                                                                                                                                                            | None                                                                                                                                                                                                                                                                                                                                                                     | None                                                                                                                                                                                                                                                                                                                                                                                          | -                                                          |
| <b>Healthy diet score</b> |                                                                                   |                                                                                                                                                                                                                                                                                                                                                                                                                 |                                                                                                                                                                                                                                                                                                                                                                          |                                                                                                                                                                                                                                                                                                                                                                                               |                                                            |
| <b>Ideal</b>              | 4–5 Components                                                                    | -                                                                                                                                                                                                                                                                                                                                                                                                               | -                                                                                                                                                                                                                                                                                                                                                                        | -                                                                                                                                                                                                                                                                                                                                                                                             | -                                                          |
| <b>Intermediate</b>       | 2–3 Components                                                                    | AHA's healthy diet score ranges from 0-5 and is calculated from sum of the following components, one point each for the consumption of fruits and vegetables ( $\geq 4.5$ cups/day), fish ( $\geq$ two 3.5-oz servings/week), fiber-rich whole grains ( $\geq$ three 1-oz-equivalent servings/day), sodium ( $< 1500$ mg/d), and sugar-sweetened beverages ( $\leq 36$ -oz/week). We estimated the healthy diet | FFQ was administrated in NHANES 2003-2004 only. FFQ in NHANES 2003-2004 was developed by the National Cancer Institute (NCI) with a 124 foods and beverage items and used a "past 12 months" reference period. The methods of estimating healthy diet score is the same as in NHANES III. For Trend analyses, we dichotomized the score as $< 2$ vs. $\geq 2$ components | FFQ was administrated in NHANES 2005-2006 only. FFQ in NHANES 2003-2004 was developed by the National Cancer Institute (NCI) with a 124 food and beverage items and used a "past 12 months" reference period. The methods of estimating healthy diet score is the same as in NHANES III. For Trend analyses, we dichotomized the score as $< 2$ vs. $\geq 2$ components due to the paucity of | Healthy diet score $\geq 2$ vs. $< 2$ components           |

|                          |                                  |                                                                                                                                                                                                                                                                                                                                                                                                                                                                                                                                                                                                                                                                                                                                                                                                                                           |                                                             |                                       |                                       |
|--------------------------|----------------------------------|-------------------------------------------------------------------------------------------------------------------------------------------------------------------------------------------------------------------------------------------------------------------------------------------------------------------------------------------------------------------------------------------------------------------------------------------------------------------------------------------------------------------------------------------------------------------------------------------------------------------------------------------------------------------------------------------------------------------------------------------------------------------------------------------------------------------------------------------|-------------------------------------------------------------|---------------------------------------|---------------------------------------|
|                          |                                  | score based on the Food Frequency Questionnaire (FFQ) for all the dietary elements, with the exception of sodium. We assumed that the reported consumption of one serving of fruit or vegetables was one cup; one serving of fish, 3.5-oz; one serving of whole grains, 1-oz equivalent of whole grains; and one serving of sugar sweetened beverages, 12-oz. For fruits and vegetable consumption, we excluded white potatoes, French fries, citrus and other fruit juice, and hot red chili peppers. For sodium intake, we used the National Cancer Institute methodology to estimate the usual intakes of sodium. <sup>18</sup> NHANES III FFQ used a “past month” reference period. For trend and association analyses, we dichotomized the score as <2 vs. ≥2 components due to the paucity of participants with a score ≥4 (<1.0%). | due to the paucity of participants with a score ≥4 (<1.0%). | participants with a score ≥4 (<1.0%). |                                       |
| <b>Poor</b>              | 0–1 Components                   | FFQ <2 components                                                                                                                                                                                                                                                                                                                                                                                                                                                                                                                                                                                                                                                                                                                                                                                                                         | FFQ <2 components                                           | FFQ <2 components                     | FFQ <2 components                     |
| <b>Total cholesterol</b> |                                  |                                                                                                                                                                                                                                                                                                                                                                                                                                                                                                                                                                                                                                                                                                                                                                                                                                           |                                                             |                                       |                                       |
| <b>Ideal<sup>a</sup></b> | <200 mg/dL                       | <200 mg/dL                                                                                                                                                                                                                                                                                                                                                                                                                                                                                                                                                                                                                                                                                                                                                                                                                                | <200 mg/dL                                                  | <200 mg/dL                            | Total cholesterol <200 vs. ≥200 mg/dL |
| <b>Intermediate</b>      | 200–239 mg/dL or treated to goal | 200–239 mg/dL or treated to goal                                                                                                                                                                                                                                                                                                                                                                                                                                                                                                                                                                                                                                                                                                                                                                                                          | 200–239 mg/dL or treated to goal                            | 200–239 mg/dL or treated to goal      | -                                     |
| <b>Poor</b>              | ≥240 mg/dL                       | ≥240 mg/dL                                                                                                                                                                                                                                                                                                                                                                                                                                                                                                                                                                                                                                                                                                                                                                                                                                | ≥240 mg/dL                                                  | ≥240 mg/dL                            | -                                     |

|                               |                                                  |                                                                                                   |                                                                                                         |                                                                                                         |                                                                                                                     |
|-------------------------------|--------------------------------------------------|---------------------------------------------------------------------------------------------------|---------------------------------------------------------------------------------------------------------|---------------------------------------------------------------------------------------------------------|---------------------------------------------------------------------------------------------------------------------|
| <b>Blood pressure</b>         |                                                  |                                                                                                   |                                                                                                         |                                                                                                         |                                                                                                                     |
| <b>Ideal<sup>a</sup></b>      | SBP<120/DBP<80 mmHg                              | SBP<120/DBP<80 mmHg                                                                               | SBP<120/DBP<80 mmHg                                                                                     | SBP<120/DBP<80 mmHg                                                                                     | SBP<120/DBP<80 mmHg vs. SBP≥120/DBP≥80 mmHg                                                                         |
| <b>Intermediate</b>           | SBP 120–139 or DBP 80–89 mmHg or treated to goal | SBP 120–139 or DBP 80–89 mmHg or treated to goal                                                  | SBP 120–139 or DBP 80–89 mmHg or treated to goal                                                        | SBP 120–139 or DBP 80–89 mmHg or treated to goal                                                        | -                                                                                                                   |
| <b>Poor</b>                   | SBP ≥140 or DBP ≥90 mm Hg                        | SBP ≥140 or DBP ≥90 mmHg                                                                          | SBP ≥140 or DBP ≥90 mmHg                                                                                | SBP ≥140 or DBP ≥90 mmHg                                                                                | -                                                                                                                   |
| <b>Fasting plasma glucose</b> |                                                  |                                                                                                   |                                                                                                         |                                                                                                         |                                                                                                                     |
| <b>Ideal</b>                  | <100 mg/dL                                       | Fasting glucose was available for a sub-sample of NHANES III participants (n=6939).<br><100 mg/dL | Fasting glucose was available for a sub-sample of NHANES 1999-2004 participants (n=5635).<br><100 mg/dL | Fasting glucose was available for a sub-sample of NHANES 2005-2010 participants (n=4124).<br><100 mg/dL | We used hemoglobin A1c <5.7% as an approximation to <100mg/dL fasting glucose. <sup>b</sup> A1c <5.7% vs. A1c ≥5.7% |
| <b>Intermediate</b>           | 100–125 mg/dL or treated to goal                 | 100–125 mg/dL or treated to goal                                                                  | 100–125 mg/dL or treated to goal                                                                        | 100–125 mg/dL or treated to goal                                                                        | -                                                                                                                   |
| <b>Poor</b>                   | ≥126 mg/dL                                       | ≥126 mg/dL                                                                                        | ≥126 mg/dL                                                                                              | ≥126 mg/dL                                                                                              | -                                                                                                                   |

<sup>a</sup> untreated values, ie, no hypertension or high cholesterol levels.

<sup>b</sup> American Diabetes Association. Standards of medical care in diabetes -2010. *Diabetes Care* 2010;33 Suppl 1:S11-61.

**eTable 2.** Adjusted Hazard Ratios (HRs) of All-Cause and CVD Mortality by Cardiovascular Health Metrics and Age Group, NHANES III (1988-1994) Linked Mortality File (Through 2006)

| Characteristics                                | Number of cardiovascular health metrics |                    |                    |                    |                    |                    | p-value for trends <sup>b</sup> | Adjusted PAF (95% CI) <sup>c</sup> |
|------------------------------------------------|-----------------------------------------|--------------------|--------------------|--------------------|--------------------|--------------------|---------------------------------|------------------------------------|
|                                                | 0-1                                     | 2                  | 3                  | 4                  | 5                  | 6+                 |                                 |                                    |
| <b>All-cause mortality</b>                     |                                         |                    |                    |                    |                    |                    |                                 |                                    |
| <b>Age &lt; 60 years</b>                       |                                         |                    |                    |                    |                    |                    |                                 |                                    |
| All deaths                                     | 46                                      | 122                | 184                | 174                | 83                 | 38                 |                                 |                                    |
| Number of participants                         |                                         |                    |                    |                    |                    |                    |                                 |                                    |
| Total person yrs                               | 3507                                    | 12401              | 27189              | 39934              | 36484              | 18798              |                                 |                                    |
| HR adjusted for age, sex & race-ethnicity only | 1.0                                     | 0.59 (0.33 - 1.06) | 0.52 (0.31 - 0.87) | 0.38 (0.25 - 0.59) | 0.23 (0.13 - 0.43) | 0.20 (0.11 - 0.38) | <0.001                          |                                    |
| Fully-adjusted HR <sup>a</sup>                 | 1.0                                     | 0.65 (0.38 - 1.11) | 0.57 (0.35 - 0.95) | 0.44 (0.29 - 0.67) | 0.30 (0.17 - 0.54) | 0.29 (0.16 - 0.52) | <0.001                          | 61.4 (5.0-88.1)                    |
| <b>Age ≥ 60 years</b>                          |                                         |                    |                    |                    |                    |                    |                                 |                                    |
| All deaths                                     | 107                                     | 323                | 527                | 544                | 287                | 84                 |                                 |                                    |
| Number of participants                         |                                         |                    |                    |                    |                    |                    |                                 |                                    |
| Total person yrs                               | 2003                                    | 6217               | 10590              | 10782              | 6307               | 2579               |                                 |                                    |
| HR adjusted for age, sex & race-ethnicity only | 1.0                                     | 0.62 (0.47 - 0.80) | 0.49 (0.37 - 0.65) | 0.39 (0.29 - 0.52) | 0.40 (0.30 - 0.53) | 0.23 (0.16 - 0.32) | <0.001                          |                                    |
| Fully-adjusted HR <sup>a</sup>                 | 1.0                                     | 0.63 (0.48 - 0.82) | 0.50 (0.38 - 0.67) | 0.41 (0.30 - 0.54) | 0.41 (0.31 - 0.56) | 0.24 (0.18 - 0.34) | <0.001                          | 54.9 (3.4-83.4)                    |
| <b>CVD mortality</b>                           |                                         |                    |                    |                    |                    |                    |                                 |                                    |
| <b>Age &lt; 60 years</b>                       |                                         |                    |                    |                    |                    |                    |                                 |                                    |
| CVD deaths                                     | 18                                      | 53                 | 63                 | 31                 | 13                 | 3                  |                                 |                                    |
| Number of participants                         |                                         |                    |                    |                    |                    |                    |                                 |                                    |
| Total person yrs                               | 3507                                    | 12401              | 27189              | 39934              | 36484              | 18798              |                                 |                                    |
| HR adjusted for age, sex & race-ethnicity only | 1.0                                     | 0.77 (0.41 - 1.47) | 0.49 (0.25 - 0.96) | 0.19 (0.09 - 0.39) | 0.09 (0.03 - 0.25) | 0.03 (0.01 - 0.13) | <0.001                          |                                    |
| Fully-adjusted HR <sup>a</sup>                 | 1.0                                     | 0.88 (0.48 - 1.60) | 0.58 (0.27 - 1.21) | 0.23 (0.10 - 0.53) | 0.12 (0.04 - 0.37) | 0.04 (0.01 - 0.23) | <0.001                          | 89.5 (7.0-99.2)                    |
| <b>Age &lt; 60 years</b>                       |                                         |                    |                    |                    |                    |                    |                                 |                                    |
| CVD deaths                                     | 52                                      | 145                | 225                | 261                | 119                | 43                 |                                 |                                    |

| Characteristics                                | Number of cardiovascular health metrics |                    |                    |                    |                    |                    | p-value for trends <sup>b</sup> | Adjusted PAF (95% CI) <sup>c</sup> |
|------------------------------------------------|-----------------------------------------|--------------------|--------------------|--------------------|--------------------|--------------------|---------------------------------|------------------------------------|
|                                                | 0-1                                     | 2                  | 3                  | 4                  | 5                  | 6+                 |                                 |                                    |
| Number of participants                         |                                         |                    |                    |                    |                    |                    |                                 |                                    |
| Total person yrs                               | 2003                                    | 6217               | 10590              | 10782              | 6307               | 2579               |                                 |                                    |
| HR adjusted for age, sex & race-ethnicity only | 1.0                                     | 0.64 (0.44 - 0.92) | 0.43 (0.30 - 0.62) | 0.40 (0.29 - 0.55) | 0.34 (0.21 - 0.53) | 0.23 (0.13 - 0.43) | <0.001                          |                                    |
| Fully-adjusted HR <sup>a</sup>                 | 1.0                                     | 0.67 (0.46 - 0.96) | 0.46 (0.32 - 0.66) | 0.43 (0.31 - 0.60) | 0.35 (0.22 - 0.57) | 0.25 (0.14 - 0.46) | <0.001                          | 43.6 (0.1-83.4)                    |

- <sup>a</sup>. Adjusted for age, sex, race/ethnicity, educational attainment, alcohol intake, family history of CVD, smoking status, physical activity, BMI, health diet score, total cholesterol, blood pressure, and hemoglobin A1c.
- <sup>b</sup>. *P*-value for Trends across the categories of cardiovascular health metrics based on Satterthwaite adjusted F-test; *P*-values for number of cardiovascular health metrics by age group interactions were 0.487 and 0.016 for the multivariable-adjusted models of all-cause and CVD mortality, respectively, based on Satterthwaite adjusted F-test; all tests two-tailed.
- <sup>c</sup>. Adjusted for age, sex, race/ethnicity, educational attainment, alcohol intake, and family history of CVD and cardiovascular health metrics.

**eTable 3.** Adjusted Hazard Ratios (HRs) of All-Cause and CVD Mortality by Cardiovascular Health Metrics and Sex, NHANES III (1988-1994) Linked Mortality File (Through 2006)

| Characteristics                                | Number of cardiovascular health metrics |                    |                    |                    |                    |                    | p-value for trends <sup>b</sup> | Adjusted full PAF <sup>c</sup> |
|------------------------------------------------|-----------------------------------------|--------------------|--------------------|--------------------|--------------------|--------------------|---------------------------------|--------------------------------|
|                                                | 0-1                                     | 2                  | 3                  | 4                  | 5                  | 6+                 |                                 |                                |
| <b>All-cause mortality</b>                     |                                         |                    |                    |                    |                    |                    |                                 |                                |
| <b>Male</b>                                    |                                         |                    |                    |                    |                    |                    |                                 |                                |
| All deaths                                     | 61                                      | 212                | 390                | 385                | 225                | 76                 |                                 |                                |
| Number of participants                         |                                         |                    |                    |                    |                    |                    |                                 |                                |
| Total person yrs                               | 2667                                    | 8906               | 19298              | 25309              | 18856              | 9038               |                                 |                                |
| HR adjusted for age, sex & race-ethnicity only | 1.0                                     | 0.77 (0.43 - 1.38) | 0.70 (0.43 - 1.14) | 0.48 (0.28 - 0.82) | 0.49 (0.29 - 0.82) | 0.34 (0.19 - 0.59) | <0.001                          |                                |
| Fully-adjusted HR <sup>a</sup>                 | 1.0                                     | 0.82 (0.46 - 1.45) | 0.75 (0.46 - 1.20) | 0.53 (0.32 - 0.89) | 0.56 (0.34 - 0.92) | 0.42 (0.24 - 0.72) | <0.001                          | 53.6 (0.0-83.8)                |
| <b>Female</b>                                  |                                         |                    |                    |                    |                    |                    |                                 |                                |
| All deaths                                     | 27                                      | 96                 | 148                | 148                | 80                 | 27                 |                                 |                                |
| Number of participants                         |                                         |                    |                    |                    |                    |                    |                                 |                                |
| Total person yrs                               | 2667                                    | 8906               | 19298              | 25309              | 18856              | 9038               |                                 |                                |
| HR adjusted for age, sex & race-ethnicity only | 1.0                                     | 1.17 (0.68 - 2.01) | 0.74 (0.42 - 1.30) | 0.55 (0.35 - 0.87) | 0.44 (0.29 - 0.67) | 0.23 (0.12 - 0.44) | <0.001                          |                                |
| Fully-adjusted HR <sup>a</sup>                 | 1.0                                     | 1.27 (0.73 - 2.22) | 0.81 (0.46 - 1.43) | 0.62 (0.39 - 0.99) | 0.51 (0.32 - 0.80) | 0.31 (0.16 - 0.59) | <0.001                          | 63.4 (17.1-86.8)               |
| <b>CVD mortality</b>                           |                                         |                    |                    |                    |                    |                    |                                 |                                |
| <b>Male</b>                                    |                                         |                    |                    |                    |                    |                    |                                 |                                |
| CVD deaths                                     | 92                                      | 233                | 321                | 333                | 145                | 46                 |                                 |                                |
| Number of participants                         |                                         |                    |                    |                    |                    |                    |                                 |                                |
| Total person yrs                               | 2843                                    | 9712               | 18481              | 25408              | 23935              | 12339              |                                 |                                |
| HR adjusted for age, sex & race-ethnicity only | 1.0                                     | 0.55 (0.41 - 0.74) | 0.44 (0.33 - 0.59) | 0.41 (0.30 - 0.57) | 0.33 (0.23 - 0.46) | 0.19 (0.12 - 0.32) | <0.001                          |                                |
| Fully-adjusted HR <sup>a</sup>                 | 1.0                                     | 0.57 (0.43 - 0.75) | 0.46 (0.35 - 0.61) | 0.43 (0.32 - 0.59) | 0.35 (0.25 - 0.49) | 0.22 (0.13 - 0.36) | <0.001                          | 67.9 (0.0-94.5)                |



| Characteristics                                | Number of cardiovascular health metrics |                    |                    |                    |                    |                    | p-value for trends <sup>b</sup> | Adjusted full PAF <sup>c</sup> |
|------------------------------------------------|-----------------------------------------|--------------------|--------------------|--------------------|--------------------|--------------------|---------------------------------|--------------------------------|
|                                                | 0-1                                     | 2                  | 3                  | 4                  | 5                  | 6+                 |                                 |                                |
| <b>Female</b>                                  |                                         |                    |                    |                    |                    |                    |                                 |                                |
| CVD deaths                                     | 43                                      | 102                | 140                | 144                | 52                 | 19                 |                                 |                                |
| Number of participants                         |                                         |                    |                    |                    |                    |                    |                                 |                                |
| Total person yrs                               | 2843                                    | 9712               | 18481              | 25408              | 23935              | 12339              |                                 |                                |
| HR adjusted for age, sex & race-ethnicity only | 1.0                                     | 0.48 (0.32 - 0.72) | 0.37 (0.24 - 0.57) | 0.31 (0.20 - 0.48) | 0.23 (0.13 - 0.41) | 0.15 (0.07 - 0.33) | <0.001                          |                                |
| Fully-adjusted HR <sup>a</sup>                 | 1.0                                     | 0.51 (0.34 - 0.76) | 0.39 (0.27 - 0.58) | 0.32 (0.21 - 0.50) | 0.24 (0.13 - 0.43) | 0.16 (0.07 - 0.36) | <0.001                          | 64.1 (0.1-92.5)                |

<sup>a</sup>. Adjusted for age, sex, race/ethnicity, educational attainment, alcohol intake, family history of CVD, smoking status, physical activity, BMI, health diet score, total cholesterol, blood pressure, and hemoglobin A1C.

<sup>b</sup>. *P*-value for Trends across the categories of cardiovascular health metrics based on Satterthwaite adjusted F-test; *P*-values for number of cardiovascular health metrics by sex interactions were 0.321 and 0.344 for the multivariable-adjusted models of all-cause and CVD mortality, respectively, based on Satterthwaite adjusted F-test; all tests two-tailed.

<sup>c</sup>. Adjusted for age, sex, race/ethnicity, educational attainment, alcohol intake, and family history of CVD and cardiovascular health metrics.

**eTable 4.** Adjusted Hazard Ratios (HRs) of All-Cause and CVD Mortality by Number of Cardiovascular Health Metrics Met and Race/Ethnicity, NHANES III (1988-1994) Linked Mortality File (Through 2006)

| Characteristics                                | Number of cardiovascular health metrics |                    |                    |                    |                    |                    | p-value for trends <sup>b</sup> | Adjusted PAF (95% CI) <sup>c</sup> |
|------------------------------------------------|-----------------------------------------|--------------------|--------------------|--------------------|--------------------|--------------------|---------------------------------|------------------------------------|
|                                                | 0-1                                     | 2                  | 3                  | 4                  | 5                  | 6+                 |                                 |                                    |
| <b>All-cause mortality</b>                     |                                         |                    |                    |                    |                    |                    |                                 |                                    |
| <b>Non-Hispanic white</b>                      |                                         |                    |                    |                    |                    |                    |                                 |                                    |
| All deaths                                     | 54                                      | 198                | 338                | 402                | 246                | 91                 |                                 |                                    |
| Number of participants                         |                                         |                    |                    |                    |                    |                    |                                 |                                    |
| Total person yrs                               | 1558                                    | 5981               | 13875              | 19938              | 16666              | 10077              |                                 |                                    |
| HR adjusted for age, sex & race-ethnicity only | 1.0                                     | 0.65 (0.47 - 0.90) | 0.54 (0.40 - 0.75) | 0.42 (0.32 - 0.56) | 0.38 (0.28 - 0.52) | 0.25 (0.18 - 0.35) | <0.001                          |                                    |
| Fully-adjusted HR <sup>a</sup>                 | 1.0                                     | 0.68 (0.49 - 0.93) | 0.58 (0.42 - 0.80) | 0.46 (0.35 - 0.60) | 0.43 (0.32 - 0.57) | 0.29 (0.22 - 0.40) | <0.001                          | 59.6 (23.3-81.0)                   |
| <b>Non-Hispanic black</b>                      |                                         |                    |                    |                    |                    |                    |                                 |                                    |
| All deaths                                     | 26                                      | 96                 | 133                | 181                | 97                 | 40                 |                                 |                                    |
| Number of participants                         |                                         |                    |                    |                    |                    |                    |                                 |                                    |
| Total person yrs                               | 1558                                    | 5981               | 13875              | 19938              | 16666              | 10077              |                                 |                                    |
| HR adjusted for age, sex & race-ethnicity only | 1.0                                     | 0.71 (0.50 - 1.01) | 0.47 (0.33 - 0.69) | 0.38 (0.27 - 0.54) | 0.30 (0.20 - 0.45) | 0.18 (0.11 - 0.29) | <0.001                          |                                    |
| Fully-adjusted HR <sup>a</sup>                 | 1.0                                     | 0.76 (0.53 - 1.08) | 0.52 (0.36 - 0.76) | 0.43 (0.30 - 0.60) | 0.33 (0.21 - 0.52) | 0.22 (0.13 - 0.36) | <0.001                          | 68.0 (16.4-90.4)                   |
| <b>Mexican American</b>                        |                                         |                    |                    |                    |                    |                    |                                 |                                    |
| All deaths                                     | 61                                      | 147                | 198                | 156                | 51                 | 15                 |                                 |                                    |
| Number of participants                         |                                         |                    |                    |                    |                    |                    |                                 |                                    |
| Total person yrs                               | 2392                                    | 6606               | 11784              | 13411              | 9863               | 4821               |                                 |                                    |
| HR adjusted for age, sex & race-ethnicity only | 1.0                                     | 0.82 (0.58 - 1.16) | 0.66 (0.47 - 0.93) | 0.65 (0.47 - 0.91) | 0.40 (0.25 - 0.64) | 0.36 (0.19 - 0.67) | <0.001                          |                                    |
| Fully-adjusted HR <sup>b</sup>                 | 1.0                                     | 0.85 (0.61 - 1.18) | 0.70 (0.49 - 0.99) | 0.69 (0.50 - 0.96) | 0.44 (0.28 - 0.71) | 0.41 (0.22 - 0.75) | 0.0016                          | 63.3 (15.1-87.2)                   |
| <b>CVD mortality</b>                           |                                         |                    |                    |                    |                    |                    |                                 |                                    |
| <b>Non-Hispanic white</b>                      |                                         |                    |                    |                    |                    |                    |                                 |                                    |

| Characteristics                                | Number of cardiovascular health metrics |                    |                    |                    |                    |                    | p-value for trends <sup>b</sup> | Adjusted PAF (95% CI) <sup>c</sup> |
|------------------------------------------------|-----------------------------------------|--------------------|--------------------|--------------------|--------------------|--------------------|---------------------------------|------------------------------------|
|                                                | 0-1                                     | 2                  | 3                  | 4                  | 5                  | 6+                 |                                 |                                    |
| CVD deaths                                     | 30                                      | 57                 | 84                 | 56                 | 13                 | 2                  |                                 |                                    |
| Number of participants                         |                                         |                    |                    |                    |                    |                    |                                 |                                    |
| Total person yrs                               | 2392                                    | 6606               | 11784              | 13411              | 9863               | 4821               |                                 |                                    |
| HR adjusted for age, sex & race-ethnicity only | 1.0                                     | 0.64 (0.42 - 0.99) | 0.56 (0.38 - 0.84) | 0.47 (0.32 - 0.69) | 0.22 (0.12 - 0.40) | 0.12 (0.02 - 0.62) | 0.001                           |                                    |
| Fully-adjusted HR <sup>a</sup>                 | 1.0                                     | 0.66 (0.41 - 1.05) | 0.61 (0.40 - 0.92) | 0.52 (0.34 - 0.78) | 0.24 (0.13 - 0.43) | 0.12 (0.02 - 0.63) | 0.003                           | 71.2 (0.1-94.6)                    |
| <b>Non-Hispanic black</b>                      |                                         |                    |                    |                    |                    |                    |                                 |                                    |
| CVD deaths                                     | 35                                      | 91                 | 161                | 143                | 60                 | 16                 |                                 |                                    |
| Number of participants                         |                                         |                    |                    |                    |                    |                    |                                 |                                    |
| Total person yrs                               | 1403                                    | 5385               | 10963              | 15393              | 14144              | 5319               |                                 |                                    |
| HR adjusted for age, sex & race-ethnicity only | 1.0                                     | 0.67 (0.45 - 1.01) | 0.70 (0.45 - 1.11) | 0.48 (0.30 - 0.77) | 0.43 (0.26 - 0.70) | 0.50 (0.28 - 0.90) | 0.009                           |                                    |
| Fully-adjusted HR <sup>a</sup>                 | 1.0                                     | 0.70 (0.47 - 1.06) | 0.72 (0.46 - 1.13) | 0.51 (0.32 - 0.82) | 0.46 (0.28 - 0.77) | 0.64 (0.34 - 1.19) | 0.026                           | 50.0 (0.0-94.5)                    |
| <b>Mexican American</b>                        |                                         |                    |                    |                    |                    |                    |                                 |                                    |
| CVD deaths                                     | 13                                      | 41                 | 65                 | 49                 | 19                 | 4                  |                                 |                                    |
| Number of participants                         |                                         |                    |                    |                    |                    |                    |                                 |                                    |
| Total person yrs                               | 1403                                    | 5385               | 10963              | 15393              | 14144              | 5319               |                                 |                                    |
| HR adjusted for age, sex & race-ethnicity only | 1.0                                     | 1.02 (0.41 - 2.51) | 0.94 (0.41 - 2.16) | 0.35 (0.15 - 0.80) | 0.36 (0.14 - 0.92) | 0.19 (0.04 - 0.84) | <0.001                          |                                    |
| Fully-adjusted HR <sup>a</sup>                 | 1.0                                     | 1.04 (0.42 - 2.56) | 0.95 (0.41 - 2.19) | 0.36 (0.16 - 0.84) | 0.37 (0.14 - 0.97) | 0.23 (0.05 - 0.97) | <0.001                          | 79.6 (0.0-98.9)                    |

a. Adjusted for age, sex, race/ethnicity, educational attainment, alcohol intake, family history of CVD, smoking status, physical activity, BMI, health diet score, total cholesterol, blood pressure, and hemoglobin A1C.

b. P-value for Trends across the categories of cardiovascular health metrics score based on Satterthwaite adjusted F-test. ; P-values for number of cardiovascular health metrics met by race/ethnicity interactions were 0.312 and 0.527 for the multivariable-adjusted models of all-cause and CVD mortality, respectively, based on Satterthwaite adjusted F-test; all tests two-tailed.

c. Adjusted for age, sex, race/ethnicity, educational attainment, alcohol intake, and family history of CVD and cardiovascular health metrics.

**eTable 5.** Adjusted Hazard Ratios (HRs) of All-Cause and CVD Mortality by Cardiovascular Health Metrics and Educational Attainment, NHANES III (1988-1994) Linked Mortality File (Through 2006)

| Characteristics                                | Number of cardiovascular health metrics |                    |                    |                    |                    |                    | p-value for trends <sup>b</sup> | Adjusted PAF (95% CI) <sup>c</sup> |
|------------------------------------------------|-----------------------------------------|--------------------|--------------------|--------------------|--------------------|--------------------|---------------------------------|------------------------------------|
|                                                | 0-1                                     | 2                  | 3                  | 4                  | 5                  | 6+                 |                                 |                                    |
| <b>All-cause mortality</b>                     |                                         |                    |                    |                    |                    |                    |                                 |                                    |
| <b>&lt;12 years of school</b>                  |                                         |                    |                    |                    |                    |                    |                                 |                                    |
| All deaths                                     | 105                                     | 264                | 419                | 409                | 170                | 46                 |                                 |                                    |
| Number of participants                         |                                         |                    |                    |                    |                    |                    |                                 |                                    |
| Total person yrs                               | 3052                                    | 9483               | 16882              | 19883              | 13372              | 3940               |                                 |                                    |
| HR adjusted for age, sex & race-ethnicity only | 1.0                                     | 0.54 (0.40 - 0.72) | 0.53 (0.40 - 0.71) | 0.42 (0.31 - 0.57) | 0.36 (0.26 - 0.51) | 0.23 (0.15 - 0.34) | <0.001                          |                                    |
| Fully-adjusted HR <sup>a</sup>                 | 1.0                                     | 0.54 (0.40 - 0.73) | 0.53 (0.40 - 0.71) | 0.43 (0.31 - 0.58) | 0.36 (0.26 - 0.51) | 0.23 (0.15 - 0.36) | <0.001                          | 61.4 (19.2-84.5)                   |
| <b>≥12 years of school</b>                     |                                         |                    |                    |                    |                    |                    |                                 |                                    |
| All deaths                                     | 48                                      | 121                | 169                | 166                | 64                 | 19                 |                                 |                                    |
| Number of participants                         |                                         |                    |                    |                    |                    |                    |                                 |                                    |
| Total person yrs                               | 3052                                    | 9483               | 16882              | 19883              | 13372              | 3940               |                                 |                                    |
| HR adjusted for age, sex & race-ethnicity only | 1.0                                     | 0.68 (0.39 - 1.19) | 0.55 (0.30 - 0.99) | 0.48 (0.24 - 0.97) | 0.33 (0.18 - 0.63) | 0.22 (0.09 - 0.55) | 0.005                           |                                    |
| Fully-adjusted HR <sup>a</sup>                 | 1.0                                     | 0.71 (0.40 - 1.24) | 0.56 (0.31 - 1.00) | 0.51 (0.25 - 1.03) | 0.34 (0.18 - 0.65) | 0.23 (0.09 - 0.58) | 0.007                           | 50.5 (0.0-85.1)                    |
| <b>CVD mortality</b>                           |                                         |                    |                    |                    |                    |                    |                                 |                                    |
| <b>&lt;12 years of school</b>                  |                                         |                    |                    |                    |                    |                    |                                 |                                    |
| CVD deaths                                     | 48                                      | 181                | 292                | 309                | 200                | 76                 |                                 |                                    |
| Number of participants                         |                                         |                    |                    |                    |                    |                    |                                 |                                    |
| Total person yrs                               | 2458                                    | 9135               | 20897              | 30833              | 29420              | 17538              |                                 |                                    |
| HR adjusted for age, sex & race-ethnicity only | 1.0                                     | 0.85 (0.48 - 1.52) | 0.65 (0.40 - 1.06) | 0.55 (0.35 - 0.84) | 0.51 (0.31 - 0.83) | 0.34 (0.20 - 0.56) | <0.001                          |                                    |
| Fully-adjusted HR <sup>a</sup>                 | 1.0                                     | 0.71 (0.05 - 1.58) | 0.69 (0.42 - 1.14) | 0.57 (0.37 - 0.88) | 0.54 (0.33 - 0.88) | 0.37 (0.22 - 0.61) | <0.001                          | 54.8 (11.7-80.5)                   |

| Characteristics                                | Number of cardiovascular health metrics |                    |                    |                    |                    |                    | p-value for trends <sup>b</sup> | Adjusted PAF (95% CI) <sup>c</sup> |
|------------------------------------------------|-----------------------------------------|--------------------|--------------------|--------------------|--------------------|--------------------|---------------------------------|------------------------------------|
|                                                | 0-1                                     | 2                  | 3                  | 4                  | 5                  | 6+                 |                                 |                                    |
| <12 years of school                            |                                         |                    |                    |                    |                    |                    |                                 |                                    |
| CVD deaths                                     | 22                                      | 77                 | 119                | 126                | 68                 | 27                 |                                 |                                    |
| Number of participants                         |                                         |                    |                    |                    |                    |                    |                                 |                                    |
| Total person yrs                               | 2458                                    | 9135               | 20897              | 30833              | 29420              | 17538              |                                 |                                    |
| HR adjusted for age, sex & race-ethnicity only | 1.0                                     | 0.78 (0.38 - 1.58) | 0.49 (0.25 - 0.97) | 0.36 (0.18 - 0.70) | 0.30 (0.16 - 0.57) | 0.18 (0.09 - 0.36) | <0.001                          |                                    |
| Fully-adjusted HR <sup>a</sup>                 | 1.0                                     | 0.83 (0.40 - 1.69) | 0.55 (0.27 - 1.11) | 0.39 (0.20 - 0.78) | 0.33 (0.17 - 0.64) | 0.21 (0.10 - 0.43) | <0.001                          | 76.3 (13.2-95.4)                   |

- <sup>a</sup>. Adjusted for age, sex, race/ethnicity, educational attainment, alcohol intake, family history of CVD, smoking status, physical activity, BMI, health diet score, total cholesterol, blood pressure, and hemoglobin A1C.
- <sup>b</sup>. *P*-value for Trends across the categories of cardiovascular health metrics profile based on Satterthwaite adjusted F-test. *P*-values for number of cardiovascular health metrics by educational attainment interactions were 0.446 and 0.818 for the multivariable-adjusted models of all-cause and CVD mortality, respectively, based on Satterthwaite adjusted F-test; all tests two-tailed.
- <sup>c</sup>. Adjusted for age, sex, race/ethnicity, educational attainment, alcohol intake, and family history of CVD and cardiovascular health metrics.

**eTable 6.** Adjusted Hazard Ratios (HRs) of All-Cancer Mortality by Cardiovascular Health Metrics, NHANES III (1988-1994) Linked Mortality File (Through 2006)

| Characteristics                                | Number of cardiovascular health metrics |                    |                    |                    |                    |                    | p-value for trends <sup>b</sup> | Adjusted PAF (95% CI) <sup>c</sup> |
|------------------------------------------------|-----------------------------------------|--------------------|--------------------|--------------------|--------------------|--------------------|---------------------------------|------------------------------------|
|                                                | 0-1                                     | 2                  | 3                  | 4                  | 5                  | 6+                 |                                 |                                    |
| <b>All-cause mortality</b>                     |                                         |                    |                    |                    |                    |                    |                                 |                                    |
| All deaths                                     | 84                                      | 180                | 189                | 106                | 60                 | 17                 |                                 |                                    |
| Number of participants                         | 1236                                    | 2608               | 3370               | 3081               | 2060               | 957                |                                 |                                    |
| Total person yrs                               | 15894                                   | 34666              | 45515              | 43030              | 29397              | 13851              |                                 |                                    |
| HR adjusted for age, sex & race-ethnicity only | 1.0                                     | 0.99 (0.66 – 1.48) | 0.88 (0.58 – 1.33) | 0.56 (0.33 - 0.95) | 0.81 (0.50 – 1.29) | 0.54 (0.27 – 1.08) | 0.050                           |                                    |
| Fully-adjusted HR <sup>a</sup>                 | 1.0                                     | 1.01 (0.68 – 1.52) | 0.90 (0.59 – 1.36) | 0.59 (0.34 - 0.99) | 0.87 (0.55 – 1.38) | 0.60 (0.29 – 1.25) | 0.098                           | 44.3 (0.0-76.0)                    |

<sup>a</sup> Adjusted for age, sex, race/ethnicity, educational attainment, alcohol intake, family history of CVD, smoking status, physical activity, BMI, health diet score, total cholesterol, blood pressure, and hemoglobin A1c.  
<sup>b</sup> P-value for Trends across the categories of cardiovascular health metrics based on Satterthwaite adjusted F-test; all tests two-tailed.  
<sup>c</sup> Adjusted for age, sex, race/ethnicity, educational attainment, alcohol intake, and family history of CVD and cardiovascular health metrics.

**eTable 7.** Weighted Prevalence, Adjusted Hazard Ratios (HRs) and Population-Attributable Fractions (PAFs) (95% Confidence Intervals) for Cardiovascular Health Metrics and Risk of All-Cause and CVD Mortality With BMI Classified as <30 vs ≥30 and Total Cholesterol as <240 vs ≥240 mg/dL, NHANES III (1988-1994) Linked Mortality File (Through 2006)

| Cardiovascular health metrics         | Cases/participants | Weighted prevalence (95% CI) | HR adjusted for age, sex and race/ethnicity only (95% CI) | Fully adjusted HR (95% CI) <sup>a</sup> | Adjusted PAF (95% CI) <sup>b</sup> |
|---------------------------------------|--------------------|------------------------------|-----------------------------------------------------------|-----------------------------------------|------------------------------------|
| <b>All-cause mortality</b>            |                    |                              |                                                           |                                         |                                    |
| <b>Current smoking</b>                |                    |                              |                                                           |                                         |                                    |
| Yes                                   | 691/3542           | 28.8 (27.1 – 30.5)           | 1.0                                                       | 1.0                                     | -                                  |
| No                                    | 1982/9770          | 71.2 (69.5 – 72.9)           | 0.46 (0.40 - 0.52)                                        | 0.49 (0.42 - 0.57)                      | 24.8 (18.3-31.1)                   |
| <b>Physical activity</b>              |                    |                              |                                                           |                                         |                                    |
| No                                    | 1722/8316          | 57.9 (55.5 – 60.3)           | 1.0                                                       | 1.0                                     | -                                  |
| Yes                                   | 951/4996           | 42.1 (39.7 – 44.7)           | 0.79 (0.74 - 0.86)                                        | 0.85 (0.77 - 0.93)                      | 10.1 (2.1-17.9)                    |
| <b>BMI</b>                            |                    |                              |                                                           |                                         |                                    |
| ≥30                                   | 655/3439           | 22.2 (20.8 – 23.6)           | 1.0                                                       | 1.0                                     | -                                  |
| <30                                   | 2018/9873          | 77.8 (76.4 – 79.2)           | 0.85 (0.74 - 0.97)                                        | 0.88 (0.77 - 0.99)                      | 1.5 (0-6.8)                        |
| <b>Healthy diet score</b>             |                    |                              |                                                           |                                         |                                    |
| <2 components                         | 1919/10245         | 74.2 (72.6 – 75.8)           | 1.0                                                       | 1.0                                     | -                                  |
| ≥2 components                         | 754/3067           | 25.8 (24.2 – 27.4)           | 0.83 (0.73 - 0.95)                                        | 0.94 (0.83 - 1.07)                      | 1.4 (0.0-14.8)                     |
| <b>Total serum cholesterol, mg/dL</b> |                    |                              |                                                           |                                         |                                    |
| ≥240                                  | 808/2775           | 20.1 (18.9 – 21.3)           | 1.0                                                       | 1.0                                     | -                                  |
| <240                                  | 1865/10537         | 79.9 (78.7 – 81.1)           | 1.04 (0.92 - 1.17)                                        | 1.06 (0.94 - 1.18)                      | n/a                                |
| <b>Blood pressure, mmHg</b>           |                    |                              |                                                           |                                         |                                    |
| ≥120/≥80                              | 2297/7947          | 54.2 (52.3 – 56.1)           | 1.0                                                       | 1.0                                     | -                                  |
| <120/<80                              | 376/5365           | 45.8 (43.9 – 47.7)           | 0.79 (0.66 - 0.94)                                        | 0.81 (0.68 - 0.95)                      | 28.5 (18.1-38.3)                   |
| <b>Hemoglobin A1c, %</b>              |                    |                              |                                                           |                                         |                                    |
| ≥5.7%                                 | 1144/3233          | 15.8 (14.2 – 17.4)           | 1.0                                                       | 1.0                                     | -                                  |
| <5.7%                                 | 1529/10079         | 84.2 (82.6 – 85.8)           | 0.69 (0.63 - 0.75)                                        | 0.73 (0.67 - 0.80)                      | 10.1 (6.2-14.7)                    |
| <b>CVD mortality</b>                  |                    |                              |                                                           |                                         |                                    |
| <b>Current smoking</b>                |                    |                              |                                                           |                                         |                                    |
| Yes                                   | 229/3542           | 28.8 (27.1 – 30.5)           | 1.0                                                       | 1.0                                     | -                                  |
| No                                    | 856/9770           | 71.2 (69.5 – 72.9)           | 0.46 (0.38 - 0.57)                                        | 0.50 (0.39 - 0.64)                      | 14.3 (5.8-22.7)                    |
| <b>Physical activity</b>              |                    |                              |                                                           |                                         |                                    |
| No                                    | 718/8316           | 57.9 (55.5 – 60.3)           |                                                           |                                         | -                                  |
| Yes                                   | 367/4996           | 42.1 (39.7 – 44.7)           | 0.74 (0.63 - 0.87)                                        | 0.77 (0.65 - 0.92)                      | 11.4 (1.0-21.7)                    |
| <b>BMI</b>                            |                    |                              |                                                           |                                         |                                    |

| <b>Cardiovascular health metrics</b>  | <b>Cases/participants</b> | <b>Weighted prevalence (95% CI)</b> | <b>HR adjusted for age, sex and race/ethnicity only (95% CI)</b> | <b>Fully adjusted HR (95% CI)<sup>a</sup></b> | <b>Adjusted PAF (95% CI)<sup>b</sup></b> |
|---------------------------------------|---------------------------|-------------------------------------|------------------------------------------------------------------|-----------------------------------------------|------------------------------------------|
| ≥30                                   | 277/3439                  | 22.2 (20.8 – 23.6)                  | 1.0                                                              | 1.0                                           | -                                        |
| <30                                   | 808/9873                  | 77.8 (76.4 – 79.2)                  | 0.77 (0.60 - 0.99)                                               | 0.82 (0.65 - 1.05)                            | 1.2 (0-9.0)                              |
| <b>Healthy diet score</b>             |                           |                                     |                                                                  |                                               |                                          |
| <2 components                         | 763/10245                 | 74.2 (72.6 – 75.8)                  |                                                                  |                                               | -                                        |
| ≥2 components                         | 322/3067                  | 25.8 (24.2 – 27.4)                  | 0.74 (0.60 - 0.90)                                               | 0.82 (0.67 - 1.02)                            | 13.2 (3.5 -29.3)                         |
| <b>Total serum cholesterol, mg/dL</b> |                           |                                     |                                                                  |                                               |                                          |
| ≥240                                  | 379/2775                  | 20.1 (18.9 – 21.3)                  | 1.0                                                              | 1.0                                           | -                                        |
| <240                                  | 706/10537                 | 79.9 (78.7 – 81.1)                  | 0.82 (0.68 - 0.97)                                               | 0.83 (0.71 - 0.98)                            | 3.7 (0-9.0)                              |
| <b>Blood pressure, mmHg</b>           |                           |                                     |                                                                  |                                               |                                          |
| ≥120/≥80                              | 981/7947                  | 54.2 (52.3 – 56.1)                  |                                                                  |                                               |                                          |
| <120/<80                              | 104/5365                  | 45.8 (43.9 – 47.7)                  | 0.61 (0.45 - 0.83)                                               | 0.64 (0.47 - 0.86)                            | 39.2 (25.0 -51.8)                        |
| <b>Hemoglobin A1c, %</b>              |                           |                                     |                                                                  |                                               |                                          |
| ≥5.7%                                 | 497/3233                  | 15.8 (14.2 – 17.4)                  |                                                                  |                                               | -                                        |
| <5.7%                                 | 588/10079                 | 84.2 (82.6 – 85.8)                  | 0.66 (0.54 - 0.80)                                               | 0.71 (0.58 - 0.86)                            | 8.2 (2.1 -14.3)                          |
|                                       |                           |                                     |                                                                  |                                               |                                          |
| <b>Current smoking</b>                |                           |                                     | <b>IHD mortality</b>                                             |                                               |                                          |
| Yes                                   | 120/3542                  | 28.8 (27.1 – 30.5)                  | 1.0                                                              | 1.0                                           | -                                        |
| No                                    | 456/9770                  | 71.2 (69.5 – 72.9)                  | 0.42 (0.32 - 0.56)                                               | 0.48 (0.35 - 0.66)                            | 18.0 (8.1-27.6)                          |
| <b>Physical activity</b>              |                           |                                     |                                                                  |                                               |                                          |
| No                                    | 377/8316                  | 57.9 (55.5 – 60.3)                  |                                                                  |                                               | -                                        |
| Yes                                   | 199/4996                  | 42.1 (39.7 – 44.7)                  | 0.76 (0.61 - 0.94)                                               | 0.83 (0.65 - 1.06)                            | 6.5 (0.0-21.0)                           |
| <b>BMI</b>                            |                           |                                     |                                                                  |                                               |                                          |
| ≥30                                   | 142/3439                  | 22.2 (20.8 – 23.6)                  | 1.0                                                              | 1.0                                           | -                                        |
| <30                                   | 434/9873                  | 77.8 (76.4 – 79.2)                  | 0.71 (0.52 - 0.96)                                               | 0.74 (0.54 - 1.01)                            | 5.7 (0-15.9)                             |
| <b>Healthy diet score</b>             |                           |                                     |                                                                  |                                               |                                          |
| <2 components                         | 412/10245                 | 74.2 (72.6 – 75.8)                  |                                                                  |                                               | -                                        |
| ≥2 components                         | 164/3067                  | 25.8 (24.2 – 27.4)                  | 0.65 (0.48 - 0.87)                                               | 0.74 (0.55 - 0.98)                            | 20.7 (1.3 -38.6)                         |
| <b>Total serum cholesterol, mg/dL</b> |                           |                                     |                                                                  |                                               |                                          |
| ≥240                                  | 198/2775                  | 20.1 (18.9 – 21.3)                  | 1.0                                                              | 1.0                                           | -                                        |
| <240                                  | 378/10537                 | 79.9 (78.7 – 81.1)                  | 0.81 (0.62 - 1.06)                                               | 0.83 (0.66 - 1.05)                            | 3.7 (0.0 – 10.8)                         |
| <b>Blood pressure, mmHg</b>           |                           |                                     |                                                                  |                                               |                                          |
| ≥120/≥80                              | 518/7947                  | 54.2 (52.3 – 56.1)                  |                                                                  |                                               |                                          |
| <120/<80                              | 58/5365                   | 45.8 (43.9 – 47.7)                  | 0.66 (0.38 - 1.12)                                               | 0.67 (0.39 - 1.13)                            | 31.7 (5.9 -53.6)                         |
| <b>Hemoglobin A1c, %</b>              |                           |                                     |                                                                  |                                               |                                          |
| ≥5.7%                                 | 262/3233                  | 15.8 (14.2 – 17.4)                  |                                                                  |                                               |                                          |



| <b>Cardiovascular health metrics</b> | <b>Cases/participants</b> | <b>Weighted prevalence (95% CI)</b> | <b>HR adjusted for age, sex and race/ethnicity only (95% CI)</b> | <b>Fully adjusted HR (95% CI)<sup>a</sup></b> | <b>Adjusted PAF (95% CI)<sup>b</sup></b> |
|--------------------------------------|---------------------------|-------------------------------------|------------------------------------------------------------------|-----------------------------------------------|------------------------------------------|
| <5.7%                                | 314/10079                 | 84.2 (82.6 – 85.8)                  | 0.66 (0.51 - 0.85)                                               | 0.71 (0.55 - 0.90)                            | 6.6 (0.1 -13.4)                          |

<sup>a</sup>. Adjusted for age, sex, race/ethnicity, educational attainment, alcohol intake, family history of CVD, smoking status, physical activity, BMI, healthy diet score, total cholesterol, blood pressure, and hemoglobin A1c.

<sup>b</sup>. Adjusted for age, sex, race/ethnicity, educational attainment, alcohol intake, family history of CVD, smoking status, physical activity, BMI, healthy diet score, total cholesterol, blood pressure, and hemoglobin A1c. The negative values of the lower 95% CI of the PAF were rounded to zero.

**eTable 8.** Adjusted Hazard Ratios (HRs) of All-Cause, CVD, and IHD Mortality by Cardiovascular Health Metrics With BMI Classified as <30 vs ≥30 and Total Cholesterol as <240 vs ≥240 mg/dL, NHANES III (1988-1994) Linked Mortality File (Through 2006)

| Characteristics                                | Number of cardiovascular health metrics <sup>a</sup> |                    |                    |                    |                    |                    | p-value for trends <sup>c</sup> | Adjusted PAF (95% CI) <sup>d</sup> |
|------------------------------------------------|------------------------------------------------------|--------------------|--------------------|--------------------|--------------------|--------------------|---------------------------------|------------------------------------|
|                                                | 0-1                                                  | 2                  | 3                  | 4                  | 5                  | 6+                 |                                 |                                    |
| <b>All-cause mortality</b>                     |                                                      |                    |                    |                    |                    |                    |                                 |                                    |
| All deaths                                     | 141                                                  | 430                | 718                | 776                | 441                | 167                |                                 |                                    |
| Number of participants                         | 410                                                  | 1347               | 2755               | 3738               | 3259               | 1803               |                                 |                                    |
| Total person yrs                               | 5197                                                 | 17448              | 36666              | 51076              | 26037              | 25928              |                                 |                                    |
| HR adjusted for age, sex & race-ethnicity only | 1.0                                                  | 0.69 (0.51 - 0.93) | 0.56 (0.43 - 0.74) | 0.47 (0.36 - 0.62) | 0.40 (0.30 - 0.54) | 0.29 (0.22 - 0.39) | <0.001                          |                                    |
| Fully-adjusted HR <sup>b</sup>                 | 1.0                                                  | 0.72 (0.54 - 0.96) | 0.60 (0.45 - 0.79) | 0.51 (0.39 - 0.65) | 0.45 (0.33 - 0.60) | 0.35 (0.26 - 0.46) | <0.001                          | 59.5 (34.0-76.8)                   |
| <b>CVD mortality</b>                           |                                                      |                    |                    |                    |                    |                    |                                 |                                    |
| CVD deaths                                     | 66                                                   | 189                | 293                | 315                | 162                | 60                 |                                 |                                    |
| Number of participants                         | 410                                                  | 1347               | 2755               | 3738               | 3259               | 1803               |                                 |                                    |
| Total person yrs                               | 5197                                                 | 17448              | 36666              | 51076              | 26037              | 25928              |                                 |                                    |
| HR adjusted for age, sex & race-ethnicity only | 1.0                                                  | 0.67 (0.50 - 0.89) | 0.48 (0.36 - 0.65) | 0.38 (0.29 - 0.50) | 0.31 (0.22 - 0.43) | 0.18 (0.12 - 0.28) | <0.001                          |                                    |
| Fully-adjusted HR <sup>b</sup>                 | 1.0                                                  | 0.70 (0.52 - 0.93) | 0.52 (0.38 - 0.70) | 0.41 (0.31 - 0.54) | 0.33 (0.23 - 0.47) | 0.21 (0.13 - 0.33) | <0.001                          | 64.9 (16.4-88.1)                   |

| Characteristics                                | Number of cardiovascular health metrics <sup>a</sup> |                    |                    |                    |                    |                    | p-value for trends <sup>c</sup> | Adjusted PAF (95% CI) <sup>d</sup> |
|------------------------------------------------|------------------------------------------------------|--------------------|--------------------|--------------------|--------------------|--------------------|---------------------------------|------------------------------------|
|                                                | 0-1                                                  | 2                  | 3                  | 4                  | 5                  | 6+                 |                                 |                                    |
| <b>IHD mortality</b>                           |                                                      |                    |                    |                    |                    |                    |                                 |                                    |
| IHD deaths                                     | 30                                                   | 108                | 153                | 163                | 87                 | 35                 |                                 |                                    |
| Number of participants                         | 410                                                  | 1347               | 2755               | 3738               | 3259               | 1803               |                                 |                                    |
| Total person yrs                               | 5197                                                 | 17448              | 36666              | 51076              | 26037              | 25928              |                                 |                                    |
| HR adjusted for age, sex & race-ethnicity only | 1.0                                                  | 0.66 (0.45 - 0.95) | 0.43 (0.31 - 0.62) | 0.32 (0.23 - 0.46) | 0.28 (0.18 - 0.43) | 0.16 (0.09 - 0.28) | <0.001                          |                                    |
| Fully-adjusted HR <sup>b</sup>                 | 1.0                                                  | 0.68 (0.48 - 0.97) | 0.46 (0.32 - 0.65) | 0.35 (0.25 - 0.49) | 0.30 (0.19 - 0.48) | 0.19 (0.10 - 0.34) | 0.0019                          | 65.7 (2.2-91.4)                    |

<sup>a</sup> BMI was classified as <30 vs. ≥30 and total cholesterol was classified as <240 vs. ≥240mg/dL.

<sup>b</sup> Adjusted for age, sex, race/ethnicity, educational attainment, alcohol intake, family history of CVD, smoking status, physical activity, BMI, healthy eating index, total cholesterol, blood pressure, and hemoglobin A1C.

<sup>c</sup> P-value for trends across the categories of cardiovascular health metrics profile based on Satterthwaite adjusted F-test; all tests two-tailed.

<sup>d</sup> Adjusted for age, sex, race/ethnicity, educational attainment, alcohol intake, and family history of CVD and all seven cardiovascular health metrics were considered together in estimating the PAF.

**eTable 9.** Baseline Characteristics by Number of Cardiovascular Health Metrics, NHANES III (1988-1994) Linked Mortality File

(Through 2006)

| Characteristics <sup>b</sup>          | No. of participants | Total weighted prevalence | Number of cardiovascular health metrics <sup>a</sup> |                       |                       |                       |                       |                       |                       |                       | p-value |
|---------------------------------------|---------------------|---------------------------|------------------------------------------------------|-----------------------|-----------------------|-----------------------|-----------------------|-----------------------|-----------------------|-----------------------|---------|
|                                       |                     |                           | 0 <sup>c</sup>                                       | 1                     | 2                     | 3                     | 4                     | 5                     | 6                     | 7 <sup>c</sup>        |         |
| No. of participants                   | 13,312              |                           | 154                                                  | 1082                  | 2608                  | 3370                  | 3081                  | 2060                  | 821                   | 136                   |         |
| <b>Total: % (95% CI)</b>              |                     |                           | 0.8<br>(0.6-1.2)                                     | 6.4<br>(5.8-7.0)      | 15.8<br>(14.7-17.0)   | 24.4<br>(23.3-25.5)   | 23.7<br>(22.6 - 24.7) | 18.2<br>(16.9 - 19.6) | 8.9<br>(8.0 - 9.9)    | 1.8<br>(1.3 - 2.4)    | <0.001  |
| <b>Age: mean (95% CI)</b>             | 13,312              | 43.4<br>(42.5 - 44.3)     | 52.5<br>(49.4 - 55.7)                                | 51.0<br>(49.7 - 52.2) | 49.3<br>(48.1 - 50.6) | 45.9<br>(44.7 - 47.0) | 41.7<br>(40.5 - 42.8) | 38.2<br>(37.1 - 39.4) | 36.5<br>(35.1 - 38.0) | 37.1<br>(34.7 - 39.5) | <0.001  |
| <b>Gender: % (95% CI)</b>             |                     |                           |                                                      |                       |                       |                       |                       |                       |                       |                       |         |
| Male                                  | 6382                | 49.6<br>(48.5 - 50.6)     | 55.8<br>(43.1 - 68.1)                                | 55.8<br>(50.8 - 60.7) | 52.6<br>(49.5 - 55.7) | 53.3<br>(50.6 - 55.9) | 52.0<br>(49.1 - 55.0) | 45.0<br>(42.2 - 47.8) | 36.5<br>(32.3 - 41.1) | 25.7<br>(17.4 - 36.1) |         |
| Female                                | 6930                | 50.4<br>(49.4 - 51.5)     | 44.1<br>(31.9 - 57.0)                                | 44.2<br>(39.3 - 49.2) | 47.4<br>(44.3 - 50.5) | 46.7<br>(44.1 - 49.4) | 48.0<br>(45.1 - 50.9) | 55.0<br>(52.2 - 57.8) | 63.5<br>(59.0 - 67.8) | 74.3<br>(63.9 - 82.6) | <0.001  |
| <b>Race/Ethnicity: % (95% CI)</b>     |                     |                           |                                                      |                       |                       |                       |                       |                       |                       |                       |         |
| Non-Hispanic White                    | 5296                | 76.4<br>(73.8 - 78.8)     | 63.7<br>(49.1 - 76.2)                                | 74.2<br>(70.5 - 77.7) | 75.0<br>(71.2 - 78.5) | 76.5<br>(73.6 - 79.2) | 76.2<br>(73.3 - 78.8) | 75.9<br>(71.5 - 79.9) | 80.0<br>(74.8 - 80.4) | 87.1<br>(81.9 - 91.0) |         |
| Non-Hispanic Black                    | 3679                | 10.5<br>(9.3 - 11.7)      | 21.8<br>(14.0 - 32.2)                                | 16.1<br>(13.5 - 19.0) | 13.2<br>(11.2 - 15.0) | 10.3<br>(8.9 - 11.7)  | 10.5<br>(9.1 - 12.0)  | 8.6<br>(7.5 - 9.8)    | 6.6<br>(5.1 - 8.5)    | 3.4<br>(2.0 - 5.7)    |         |
| Mexican American                      | 3786                | 5.3<br>(4.5 - 6.2)        | 5.8<br>(3.7 - 9.2)                                   | 4.9<br>(4.0 - 5.9)    | 6.3<br>(5.3 - 7.4)    | 5.3<br>(4.5 - 6.3)    | 5.6<br>(4.6 - 6.9)    | 5.3<br>(4.1 - 6.8)    | 3.4<br>(2.6 - 4.4)    | 2.7<br>(1.7 - 4.2)    |         |
| Other                                 | 551                 | 7.9<br>(6.4 - 9.8)        | 8.7<br>(2.3 - 27.5)                                  | 4.8<br>(3.0 - 7.8)    | 5.5<br>(3.5 - 8.6)    | 7.9<br>(6.1 - 10.2)   | 7.3<br>(6.3 - 9.5)    | 10.2<br>(7.3 - 14.3)  | 10.0<br>(6.4 - 15.3)  | 6.9<br>(3.5 - 13.0)   | <0.001  |
| <b>Years of education: % (95% CI)</b> |                     |                           |                                                      |                       |                       |                       |                       |                       |                       |                       |         |
| 0 - 11                                | 5261                | 23.6<br>(21.7 - 25.7)     | 44.1<br>(29.0 - 60.4)                                | 38.0<br>(32.0 - 44.3) | 32.4<br>(29.1 - 36.0) | 26.5<br>(23.8 - 29.3) | 23.3<br>(20.6 - 26.3) | 16.3<br>(13.8 - 19.1) | 7.7<br>(5.1 - 11.6)   | 4.15<br>(1.7 - 9.9)   |         |

| Characteristics <sup>b</sup>                              | No. of participants | Total weighted prevalence | Number of cardiovascular health metrics <sup>a</sup> |                       |                       |                       |                       |                       |                       |                       | p-value |
|-----------------------------------------------------------|---------------------|---------------------------|------------------------------------------------------|-----------------------|-----------------------|-----------------------|-----------------------|-----------------------|-----------------------|-----------------------|---------|
|                                                           |                     |                           | 0 <sup>c</sup>                                       | 1                     | 2                     | 3                     | 4                     | 5                     | 6                     | 7 <sup>c</sup>        |         |
| 12 - 15                                                   | 6362                | 55.2<br>(53.4 - 57.0)     | 54.4<br>(37.9 - 70.0)                                | 52.3<br>(46.8 - 57.7) | 55.2<br>(52.0 - 58.4) | 58.1<br>(55.2 - 61.0) | 55.5<br>(51.9 - 59.1) | 53.7<br>(50.2 - 57.2) | 53.5<br>(48.6 - 58.3) | 46.5<br>(33.5 - 59.9) |         |
| ≥16                                                       | 1689                | 21.2<br>(19.4 - 23.0)     | 1.5<br>(0.5 - 4.1)                                   | 9.8<br>(7.0 - 13.5)   | 12.4<br>(10.2 - 14.9) | 15.5<br>(13.0 - 18.3) | 21.1<br>(18.8 - 23.7) | 30.0<br>(26.6 - 33.7) | 38.8<br>(33.0 - 44.9) | 49.4<br>(37.7 - 61.2) | <0.001  |
| <b>Alcohol intake (drinks/wk): % (95% CI)<sup>d</sup></b> |                     |                           |                                                      |                       |                       |                       |                       |                       |                       |                       |         |
| None                                                      | 2582                | 20.6<br>(18.3 - 23.1)     | 21.5<br>(10.3 - 39.5)                                | 19.5<br>(15.0 - 24.9) | 24.7<br>(21.4 - 28.3) | 20.9<br>(17.2 - 25.1) | 19.5<br>(16.3 - 23.1) | 20.8<br>(17.6 - 24.4) | 18.3<br>(14.2 - 23.1) | 12.9<br>(6.6 - 23.8)  |         |
| <3/per week                                               | 2928                | 39.3<br>(37.1 - 41.5)     | 19.5<br>(12.0 - 30.3)                                | 35.0<br>(29.0 - 41.5) | 33.6<br>(30.3 - 37.1) | 35.8<br>(32.4 - 39.4) | 38.5<br>(34.4 - 42.9) | 42.4<br>(38.2 - 46.6) | 52.1<br>(46.6 - 57.6) | 52.4<br>(40.5 - 64.1) |         |
| ≥3/per week                                               | 3156                | 40.1<br>(37.6 - 42.7)     | 59.0<br>(42.0 - 74.0)                                | 45.5<br>(38.8 - 52.4) | 41.7<br>(37.7 - 45.8) | 43.3<br>(38.9 - 47.8) | 42.0<br>(38.0 - 46.1) | 36.8<br>(33.0 - 40.9) | 29.6<br>(24.2 - 35.6) | 34.7<br>(23.8 - 47.4) | <0.001  |
| <b>Family history of CVD: % (95% CI)</b>                  |                     |                           |                                                      |                       |                       |                       |                       |                       |                       |                       |         |
| Yes                                                       | 1112                | 10.3<br>(9.4 - 11.3)      | 10.0<br>(4.9 - 19.3)                                 | 15.0<br>(12.8 - 17.6) | 11.1<br>(9.0 - 13.4)  | 11.3<br>(9.5 - 13.3)  | 10.0<br>(8.3 - 12.1)  | 8.7<br>(6.7 - 11.2)   | 7.9<br>(5.5 - 11.2)   | 7.3<br>(2.7 - 18.2)   |         |
| No                                                        | 12200               | 89.7<br>(88.7 - 90.6)     | 90.0<br>(80.7 - 95.1)                                | 85.0<br>(82.4 - 87.2) | 88.9<br>(86.6 - 91.0) | 88.7<br>(86.7 - 90.5) | 90.0<br>(87.9 - 91.7) | 91.3<br>(88.8 - 93.3) | 92.1<br>(88.8 - 94.5) | 92.7<br>(81.8 - 97.3) | 0.005   |
| <b>Cardiovascular health-factors</b>                      |                     |                           |                                                      |                       |                       |                       |                       |                       |                       |                       |         |
| <b>Current smoking: Number and % (95% CI)</b>             |                     |                           |                                                      |                       |                       |                       |                       |                       |                       |                       |         |
| Number of participants                                    | 9770                |                           | 0                                                    | 548                   | 1717                  | 2475                  | 2358                  | 1760                  | 776                   | 136                   |         |
| Yes (%)                                                   |                     | 71.2<br>(69.5 - 72.9)     | 0                                                    | 40.5<br>(35.4 - 45.9) | 60.3<br>(56.7 - 63.8) | 68.3<br>(65.5 - 72.2) | 71.4<br>(67.9 - 74.7) | 83.7<br>(80.6 - 86.4) | 93.4<br>(90.9 - 95.3) | 100.0                 |         |
| Number of participants                                    | 3542                |                           | 154                                                  | 534                   | 891                   | 895                   | 723                   | 300                   | 45                    | 0                     |         |

| Characteristics <sup>b</sup>                     | No. of participants | Total weighted prevalence | Number of cardiovascular health metrics <sup>a</sup> |                       |                       |                       |                       |                       |                       |                | p-value |
|--------------------------------------------------|---------------------|---------------------------|------------------------------------------------------|-----------------------|-----------------------|-----------------------|-----------------------|-----------------------|-----------------------|----------------|---------|
|                                                  |                     |                           | 0 <sup>c</sup>                                       | 1                     | 2                     | 3                     | 4                     | 5                     | 6                     | 7 <sup>c</sup> |         |
| No (%)                                           |                     | 28.8<br>(27.1 - 30.6)     | 100                                                  | 59.5<br>(54.1 - 64.6) | 39.7<br>(36.2 - 43.3) | 31.1<br>(27.8 - 34.5) | 28.6<br>(25.3 - 32.1) | 16.3<br>(13.6 - 19.4) | 6.6<br>(4.7 - 9.1)    | -              | <0.001  |
| <b>Physical activity: number and % (95% CI)</b>  |                     |                           |                                                      |                       |                       |                       |                       |                       |                       |                |         |
| Number of participants                           | 4996                |                           | 0                                                    | 60                    | 448                   | 1071                  | 1393                  | 1171                  | 717                   | 136            |         |
| Yes (%)                                          |                     | 42.1<br>(39.7 - 44.5)     | 0                                                    | 5.4<br>(3.7 - 7.8)    | 16.2<br>(13.5 - 19.2) | 32.1<br>(29.1 - 35.2) | 47.0<br>(44.1 - 50.0) | 58.7<br>(55.1 - 62.2) | 87.0<br>(82.5 - 90.4) | 100            |         |
| Number of participants                           | 8316                |                           | 154                                                  | 1022                  | 2160                  | 2299                  | 1688                  | 889                   | 104                   | 0              |         |
| No (%)                                           |                     | 57.9<br>(55.5 - 60.3)     | 100.0                                                | 94.6<br>(92.2 - 96.3) | 83.5<br>(80.8 - 86.5) | 67.9<br>(64.9 - 70.9) | 53.0<br>(50.0 - 55.9) | 41.3<br>(37.8 - 44.9) | 13.0<br>(9.6 - 17.5)  | 0              | <0.001  |
| <b>BMI: number and % (95% CI)</b>                |                     |                           |                                                      |                       |                       |                       |                       |                       |                       |                |         |
| Number of participants                           | 5152                |                           | 0                                                    | 65                    | 343                   | 907                   | 1482                  | 1491                  | 728                   | 136            |         |
| <25                                              |                     | 44.1<br>(42.4 - 45.9)     | 0                                                    | 5.8<br>(4.3 - 7.9)    | 12.9<br>(10.9 - 15.2) | 26.5<br>(23.9 - 29.4) | 50.5<br>(47.2 - 53.9) | 73.9<br>(70.7 - 76.9) | 90.1<br>(86.3 - 92.9) | 100            | <0.001  |
| Number of participants                           | 8160                |                           | 154                                                  | 1017                  | 2265                  | 2463                  | 1599                  | 569                   | 93                    | 0              |         |
| ≥25                                              |                     | 55.9 (54.1-57.6)          | 100                                                  | 94.2<br>(92.1-95.7)   | 87.1<br>(84.8-89.1)   | 73.5<br>(70.6-76.2)   | 49.5<br>(46.2-52.8)   | 26.1<br>(23.1-29.3)   | 9.9<br>(7.1-13.7)     | 0              |         |
| <b>Healthy diet score: number and % (95% CI)</b> |                     |                           |                                                      |                       |                       |                       |                       |                       |                       |                |         |
| Number of participants                           | 3067                |                           | 0                                                    | 41                    | 328                   | 675                   | 764                   | 693                   | 430                   | 136            |         |
| ≥2 components                                    |                     | 25.8<br>(24.3 - 27.4)     | 0                                                    | 3.1<br>(1.6 - 6.1)    | 11.7<br>(10.1 - 13.6) | 19.8<br>(17.4 - 22.5) | 24.7<br>(22.4 - 27.2) | 34.7<br>(31.1 - 38.5) | 55.7<br>(50.6 - 60.6) | 100            | <0.001  |
| Number of participants                           | 10245               |                           | 154                                                  | 1041                  | 2280                  | 2695                  | 2317                  | 1367                  | 391                   | 0              |         |

| Characteristics <sup>b</sup>                                   | No. of participants | Total weighted prevalence | Number of cardiovascular health metrics <sup>a</sup> |                      |                       |                      |                      |                      |                      |                | p-value |
|----------------------------------------------------------------|---------------------|---------------------------|------------------------------------------------------|----------------------|-----------------------|----------------------|----------------------|----------------------|----------------------|----------------|---------|
|                                                                |                     |                           | 0 <sup>c</sup>                                       | 1                    | 2                     | 3                    | 4                    | 5                    | 6                    | 7 <sup>c</sup> |         |
| <2 components                                                  |                     | 74.2<br>(72.6 – 75.7)     | 100                                                  | 96.9<br>(93.9–98.4)  | 88.3<br>(86.4–89.9)   | 80.2<br>(77.6–82.6)  | 75.3<br>(72.9–77.6)  | 65.3<br>(61.6–68.9)  | 44.4<br>(39.4–49.5)  | 0              | <0.001  |
| <b>Total serum cholesterol, (mg/dL): number and % (95% CI)</b> |                     |                           |                                                      |                      |                       |                      |                      |                      |                      |                |         |
| Number of participants                                         | 6481                |                           | 0                                                    | 81                   | 569                   | 1403                 | 1886                 | 1662                 | 744                  | 136            |         |
| <200mg/dL                                                      |                     | 49.7<br>(48.0 – 51.5)     | 0                                                    | 5.7<br>(4.2 – 7.9)   | 17.3<br>(14.7- 20.2)  | 37.5<br>(34.8- 40.2) | 58.5<br>(55.5-61.5)  | 77.3<br>(74.9-79.6)  | 87.0<br>(83.2-90.0)  | 100            |         |
| Number of participants                                         | 6831                |                           | 154                                                  | 1001                 | 2039                  | 1967                 | 1195                 | 398                  | 77                   | 0              |         |
| ≥200mg/dL                                                      |                     | 50.3<br>(48.5-52.0)       | 100                                                  | 94.3<br>(92.1-95.9)  | 82.7<br>(79.8-85.3)   | 62.5<br>(59.8-65.2)  | 41.5<br>(38.5-44.5)  | 22.7<br>(20.4-25.1)  | 13.0<br>(10.0-16.8)  | 0              | <0.001  |
| <b>Blood pressure (mmHg): Number and % (95% CI)</b>            |                     |                           |                                                      |                      |                       |                      |                      |                      |                      |                |         |
| Number of participants                                         | 5365                |                           | 0                                                    | 37                   | 342                   | 954                  | 1636                 | 1534                 | 726                  | 136            |         |
| <120/80 mmHg                                                   |                     | 45.8<br>(43.9-47.7)       | 0                                                    | 4.9<br>(3.1-7.5)     | 14.6<br>(12.1-17.4)   | 30.5<br>(27.4-33.8)  | 53.2<br>(50.6-55.9)  | 74.1<br>(71.1-76.9)  | 88.0<br>(84.0-91.2)  | 100            |         |
| Number of participants                                         | 7947                |                           | 154                                                  | 1045                 | 2266                  | 2416                 | 1445                 | 526                  | 95                   | 0              |         |
| ≥120/80 mmHg                                                   |                     | 54.2<br>(52.3-56.1)       | 100                                                  | 95.1<br>(92.5-96.9)  | 85.5<br>(82.6-87.9)   | 69.5<br>(66.2-72.7)  | 46.8<br>(44.1-49.4)  | 25.9<br>(23.1-28.9)  | 12.0<br>(8.9-16.0)   | 0              | <0.001  |
| <b>Hemoglobin A1c (%): number and % (95% CI)</b>               |                     |                           |                                                      |                      |                       |                      |                      |                      |                      |                |         |
| Number of participants                                         | 10079               |                           | 0                                                    | 250                  | 1469                  | 2627                 | 2805                 | 1989                 | 805                  | 136            |         |
| <5.7%                                                          |                     | 84.2<br>(82.5 - 85.8)     | 0                                                    | 34.5<br>(28.9- 40.5) | 67.1<br>(63.7 - 70.3) | 84.7<br>(82.2- 86.9) | 94.6<br>(93.5- 95.5) | 97.5<br>(96.4- 98.3) | 98.9<br>(97.3- 99.5) | 100            |         |
| Number of participants                                         | 3233                |                           | 154                                                  | 832                  | 1139                  | 745                  | 276                  | 71                   | 16                   | 0              |         |
| ≥5.7%                                                          |                     | 15.8<br>(14.2- 17.5)      | 100                                                  | 65.5<br>(59.5- 71.1) | 32.9<br>(29.7- 36.3)  | 15.3<br>(13.1- 17.8) | 5.4<br>(4.5- 6.5)    | 2.5<br>(1.7- 3.6)    | 1.2<br>(0.5- 2.7)    | 0              | <0.001  |

- a. Mean and percentage (%) presented by number of cardiovascular health metrics met.
- b. For the continuous variables (e.g., age and BMI), p-value for difference across the CV health-factor categories. For categorical variables (e.g., race-ethnicity), we presented  $\chi^2$  test. All tests were two-tailed and based on Satterthwaite adjusted F-test.
- c. For all categorical variables among the participants with zero or seven cardiovascular health metrics, the relative standard error (RSE), defined as the ratio of the standard error of the estimate divided by the estimate multiplied by 100, were >30% indicating the unreliable estimates (National Center for Health Statistics. ANALYTIC AND REPORTING GUIDELINES: The Third National Health and Nutrition Examination Survey. Hyattsville, Maryland: U.S. Department of Health and Human Services, Public Health Service, CDC; 1996).
- d. Approximately 35% of participants had missing information on frequency and amount of alcohol consumed in the past 12 months; we couldn't calculate the average drinks per week for those participants. However, the distributions of missing data were similar by the number of cardiovascular health metrics met; so we included those with missing information on frequency and amount of alcohol consumed as a category in the multivariable analyses.
